# Supplementary material for: Improving the cycling performance of LiFePO4 cathode material by poly(3,4-ethylenedioxythiopene) coating
Source: Royal Society of Chemistry journal article supplement (doi:10.1039/c4ra05286b), 2014-01-01
Supplement: c4ra05286b1.pdf [file c4ra05286b1.pdf]

**Supporting Info for:**

**Improving the cycling performance of  $\text{LiFePO}_4$  cathode material by poly(3,4-ethylenedioxythiophene) coating**

D. Cíntora-Juárez,<sup>a</sup> C. Pérez-Vicente<sup>a</sup>, Shahzada Ahmad<sup>b\*</sup> and J. L. Tirado<sup>a\*</sup>

<sup>a</sup> *Laboratorio de Química Inorgánica, Campus de Rabanales, Universidad de Córdoba, Córdoba, Spain.*

<sup>b</sup> *Abengoa Research, C/ Energía Solar n° 1, Campus Palmas Altas-41014, Sevilla, Spain*

*E-mail: shahzada.ahmad@research.abengoa.com*

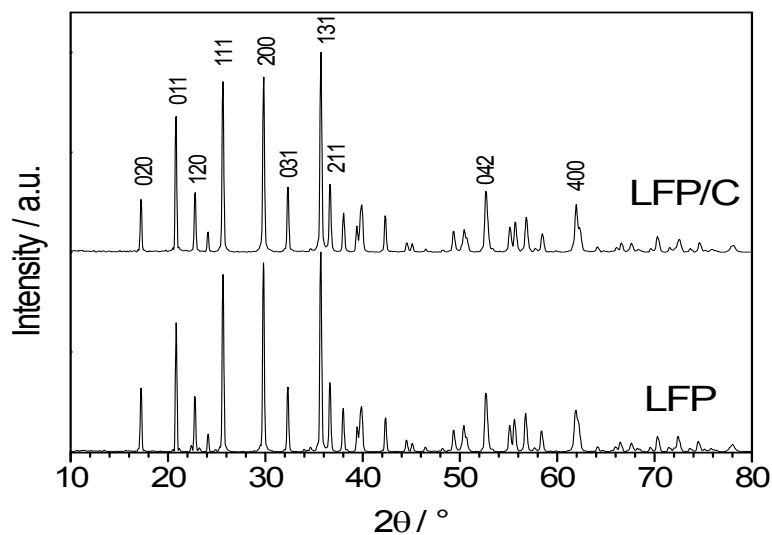

Fig. S1: XRD patterns of LFP and LFP/C active materials

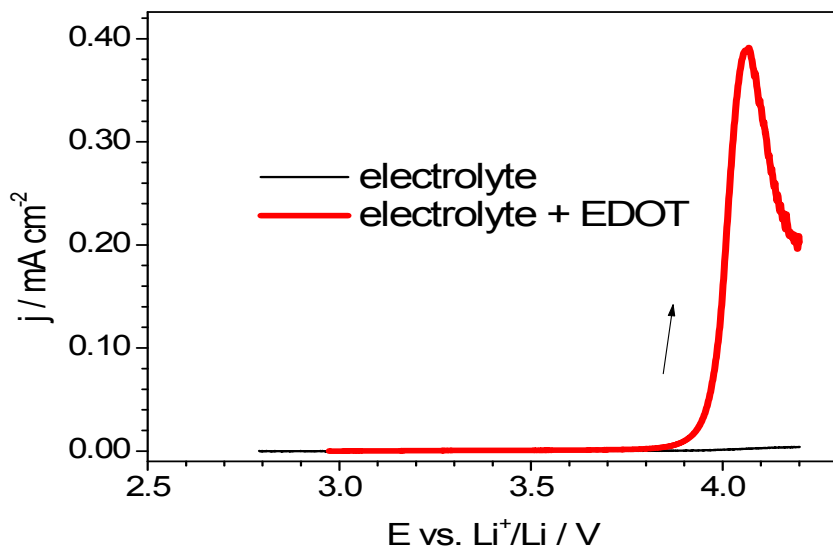

Fig. S2: Linear voltammetry plot of 0.01M EDOT in the LiPF<sub>6</sub>-based battery electrolyte.
